# Supplementary material
Source: Springer Nature journal article supplement (https://www.springermedizin.de/resource/supplementary/12885_2012_3747_MOESM3_ESM.pdf/9464806)

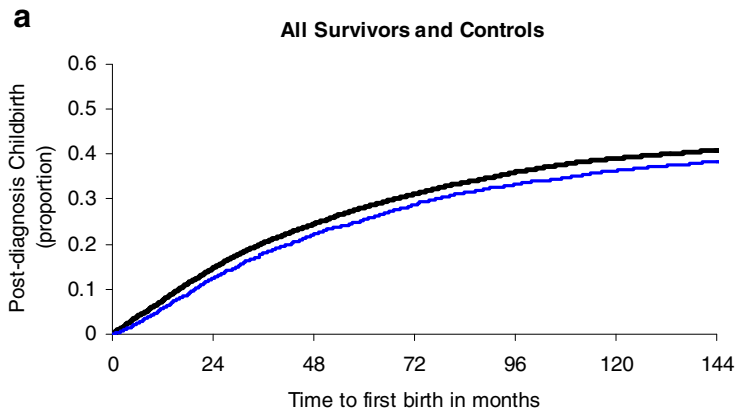

Number at Risk

|          |       |       |      |      |
|----------|-------|-------|------|------|
| YAS      | 3285  | 2405  | 1897 | 1159 |
| Controls | 15176 | 11015 | 8865 | 5677 |

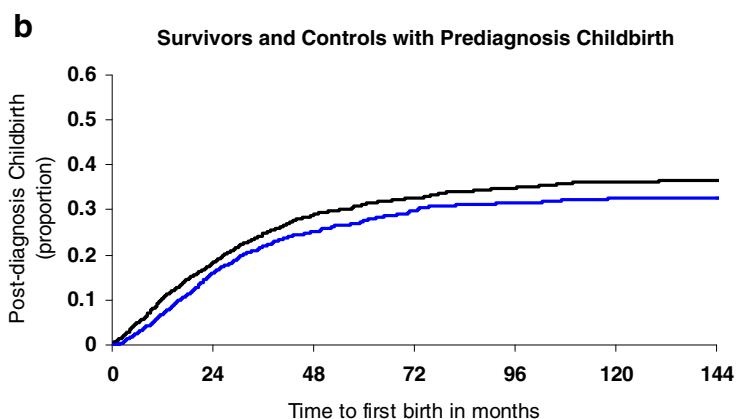

Number at risk

|          |      |      |      |     |
|----------|------|------|------|-----|
| YAS      | 1093 | 733  | 607  | 349 |
| Controls | 2066 | 1359 | 1142 | 666 |

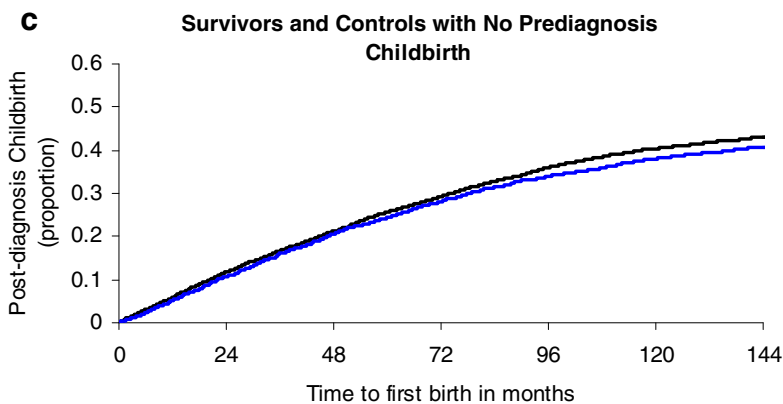

Number at risk

|          |      |      |      |      |
|----------|------|------|------|------|
| YAS      | 2192 | 1672 | 1290 | 810  |
| Controls | 6937 | 5361 | 4181 | 2726 |

Supplement: MOESM3 [file 9464806]
